# Supplementary figures and images for: Child and Maternal Factors Associated with Feeding Practices in Children with Poor Growth
Source: MDPI journal article supplement (doi:10.3390/nu15224850), 2023-11-20

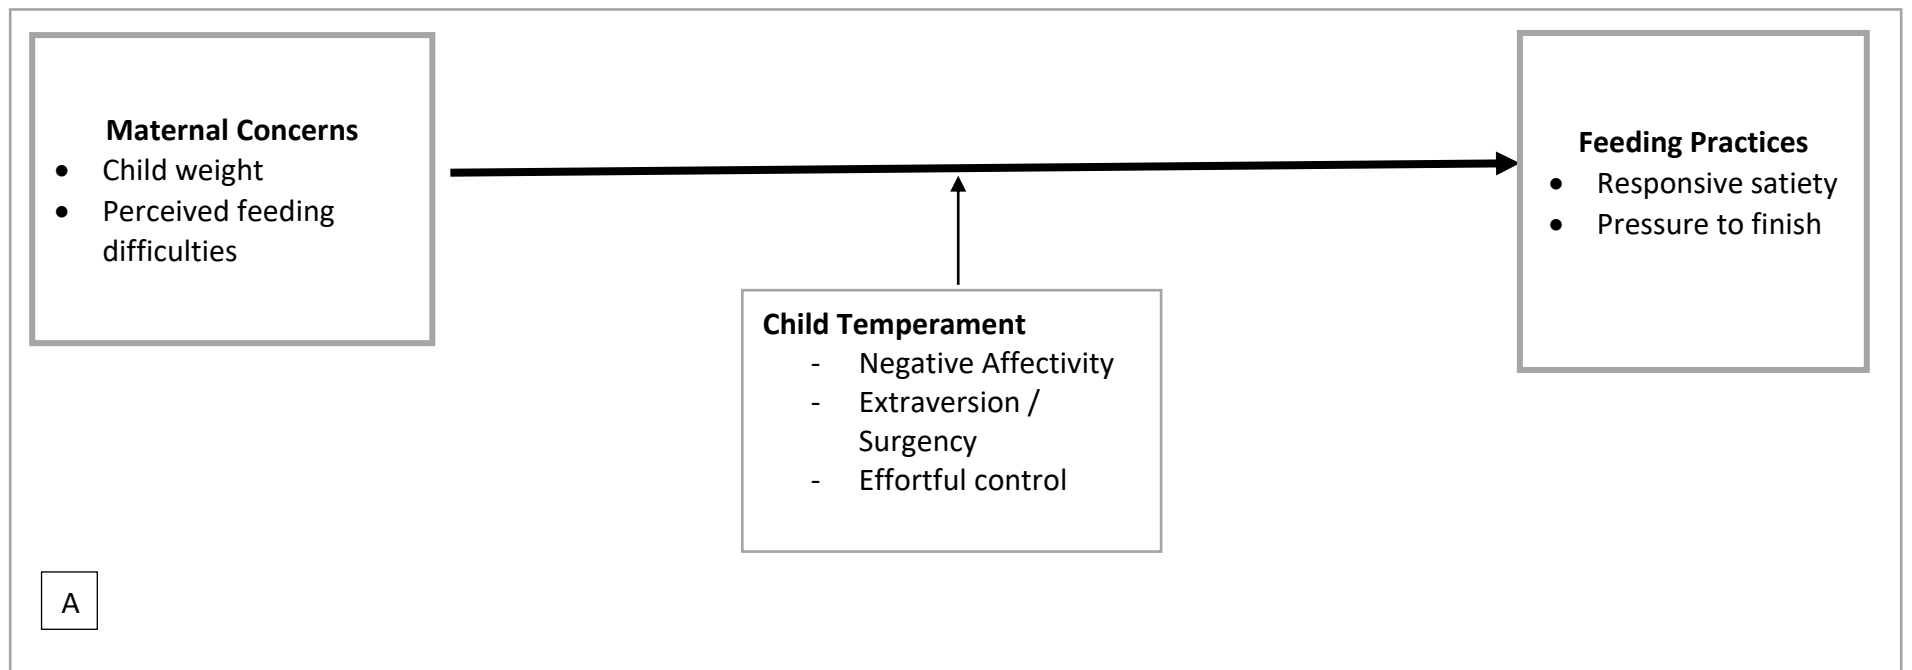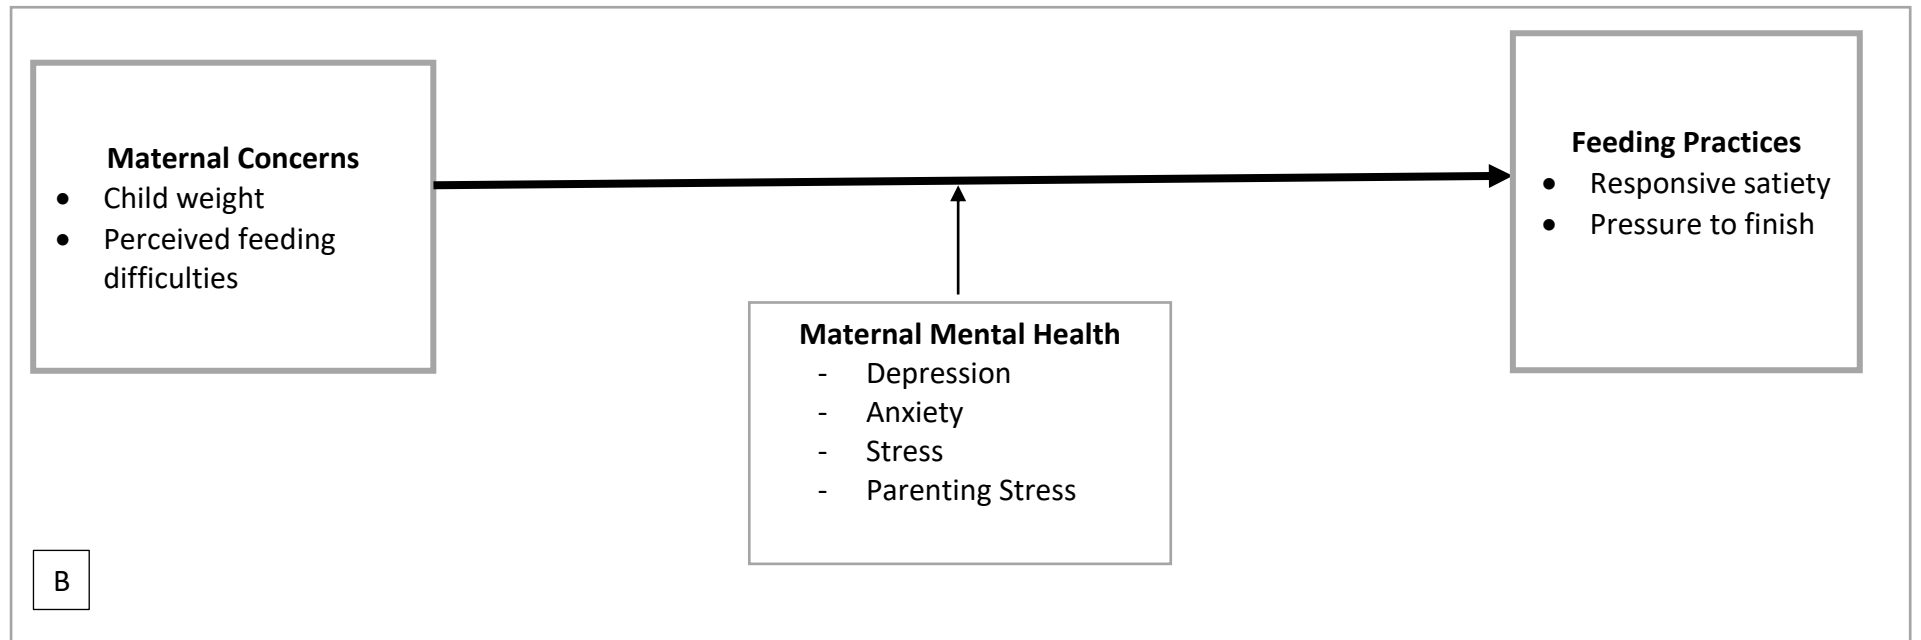

Supplement: s1 [file s1]
